# Supplementary material for: Discovery of a Kojibiose Hydrolase by Analysis of Specificity-Determining Correlated Positions in Glycoside Hydrolase Family 65
Source: MDPI journal article supplement (doi:10.3390/molecules26206321), 2021-10-19
Supplement: s1 [file s1]

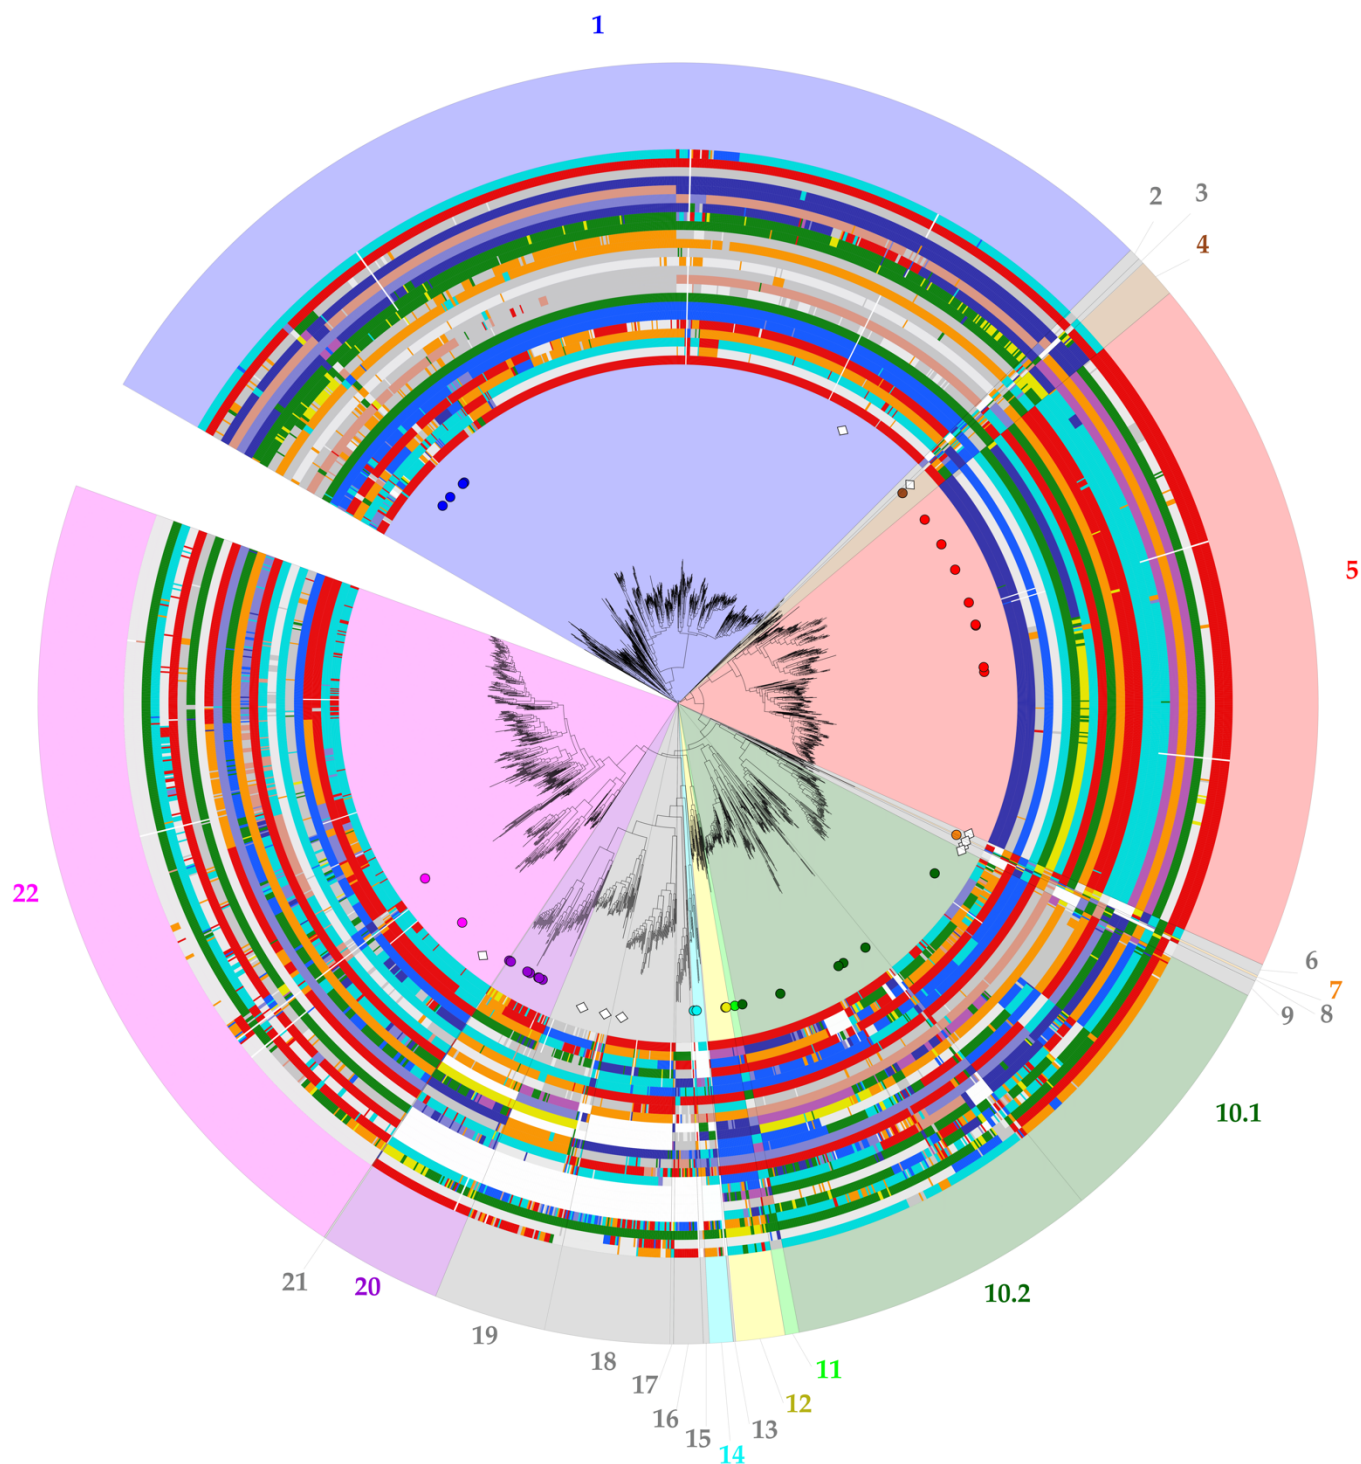

**Figure S1.** Phylogenetic tree of family GH65 with a visualization of the amino acids present at 24 correlated positions, shown as colored rings around the phylogenetic tree. From inside to outside, these rings represent positions 56, 62, 63, 64, 338, 378, 392, 394, 402, 416, 417, 418, 420, 485, 486, 487, 581, 584, 585, 586, 590, 603, 630 and 669 (CsKP numbering). All annotated representatives and all new enzymes discussed in this study are indicated with circles and diamonds, respectively. The tree is divided into 22 subgroups, which are colored according to their putative specificity. The reader is referred to the legend of Figure 3 for the explanation of the colors and symbols used in this figure.

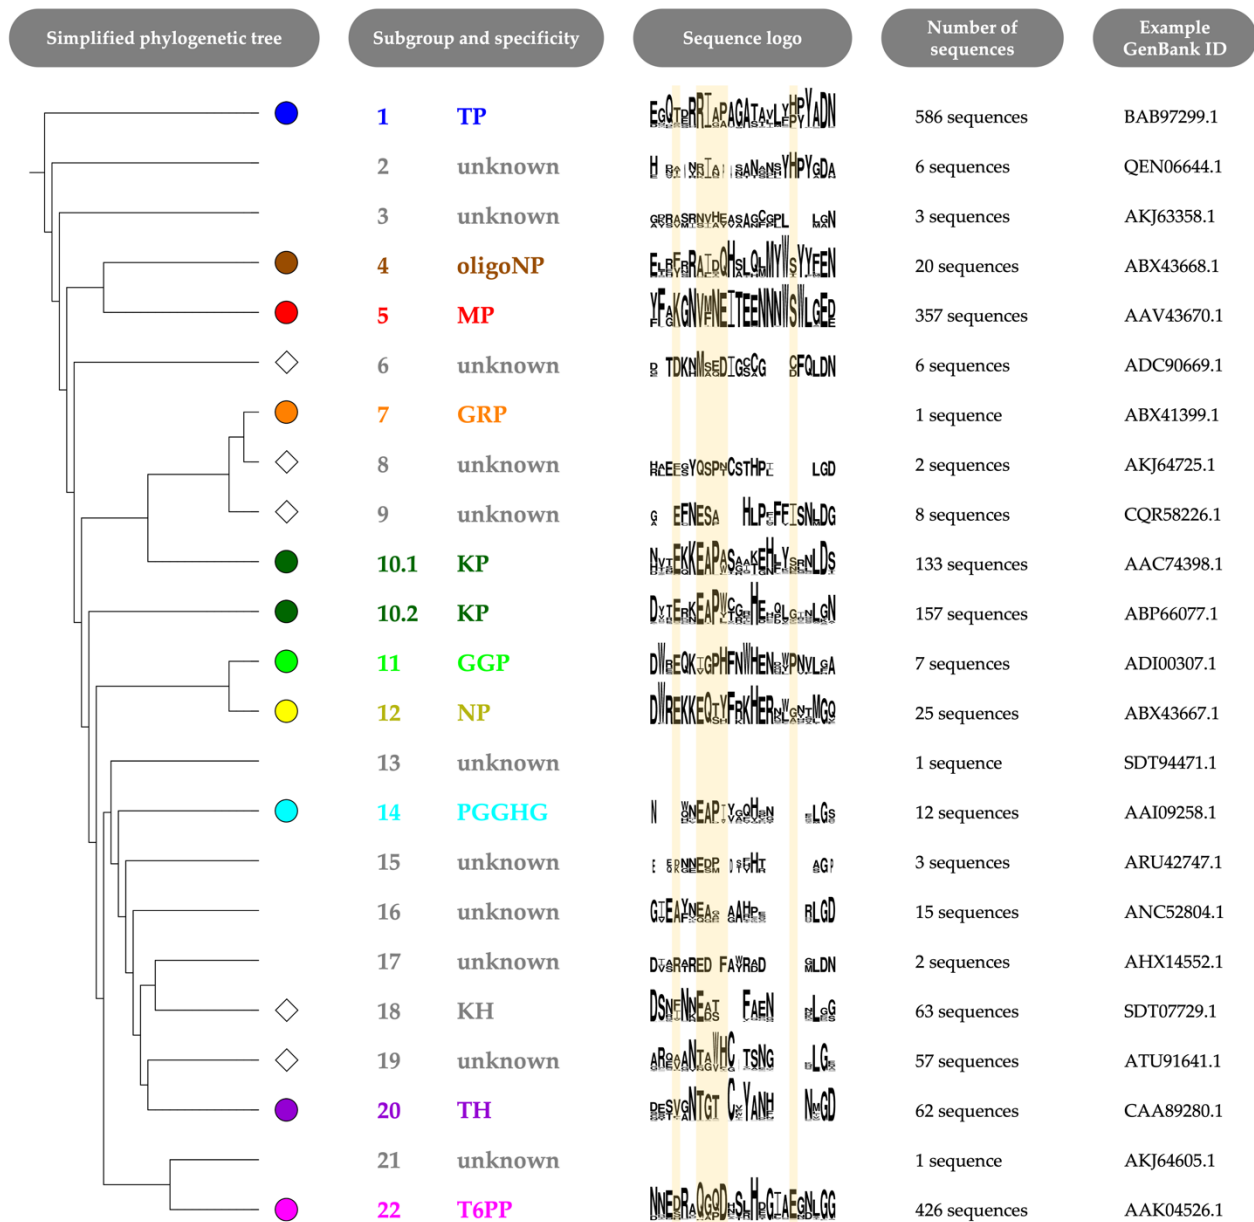

**Figure S2.** Simplified phylogenetic tree with sequence logo of 24 correlated positions (left to right, positions 56, 62, 63, 64, 338, 378, 392, 394, 402, 416, 417, 418, 420, 485, 486, 487, 581, 584, 585, 586, 590, 603, 630 and 669; CsKP numbering). The six selected correlated positions are highlighted in yellow. A sequence logo for subgroups 7, 13 and 21 is not shown, as these branches contain only one sequence (with motifs DQISNNVSWRHPLHPY--QAHLSC, D-DAGNEAP---HAE-----L-- and D--EGRQDRRDIDHTGQA---PFE, respectively). The GenBank ID of one member of each subgroup is provided as example.

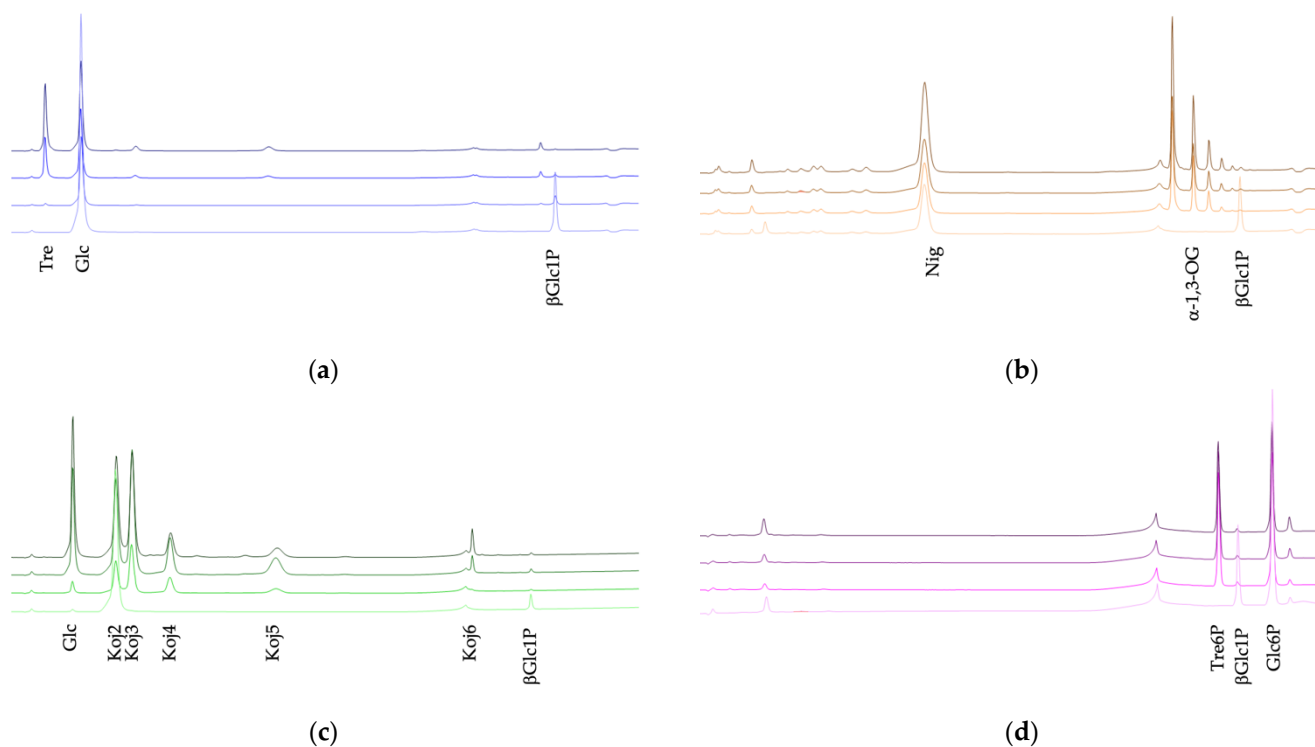

**Figure S3.** Reaction profile of selected GH65 glycoside phosphorylases in the synthetic direction of the reversible reaction: **(a)** Activity of the phosphorylase from *Thermobispora bispora* (TbGP) on glucose; **(b)** Activity of the phosphorylase from *Caldicellulosiruptor hydrothermalis* (ChGP) on nigerose; **(c)** Activity of the phosphorylase of *Halothermothrix orenii* (HoGP) on kojibiose; **(d)** Activity of the phosphorylase of *Caldithrix abyssi* (CaGP) on glucose 6-phosphate. Samples were taken at the start of the reaction and after 1, 6 and 24 hours (bottom to top chromatogram in overlay) and were analyzed with HPAEC-PAD. All reactions contained 10 mM  $\beta$ Glc1P, 10 mM of the acceptor and 0.1 mg/mL purified enzyme in 50 mM MOPS buffer (pH 7.0) at 30 °C. Glc: D-glucose, Glc6P: D-glucose 6-phosphate, Koj2: kojibiose, Koj3: kojitrise, Koj4: kojitetraose, Koj5: kojipentaose, Koj6: kojihexaose, Nig: nigerose, Tre: trehalose, Tre6P: trehalose 6-phosphate,  $\alpha$ -1,3-OG:  $\alpha$ -1,3-oligoglucans,  $\beta$ Glc1P:  $\beta$ -D-glucose 1-phosphate.

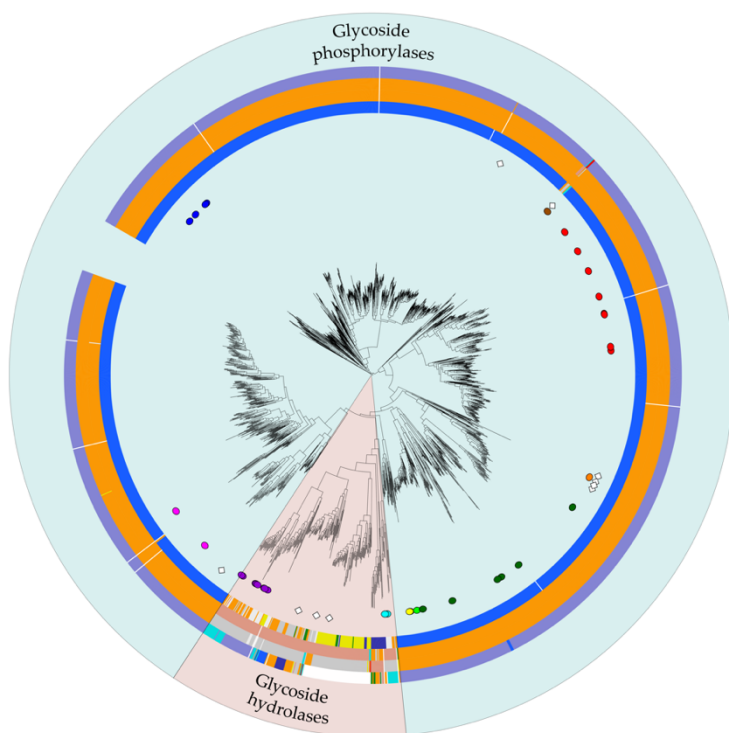

(a)

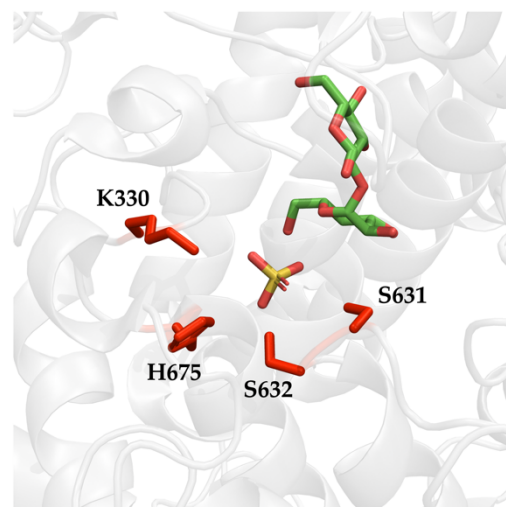

(b)

**Figure S4.** Glycoside phosphorylases and hydrolases in family GH65: **(a)** Phylogenetic tree of family GH65 with a visualization of the amino acids present at four positions known to be involved in phosphate binding, shown as colored rings around the phylogenetic tree. From inside to outside, these rings represent positions 330, 631, 632 and 675 (CsKP numbering). The reader is referred to the legend of Figure 3 for the explanation of the colors and symbols used in this figure; **(b)** Location of positions 330, 631, 632 and 675 (red sticks) in the structure of CsKP (PDB ID: 3WIQ). Kojibiose (green sticks) and sulphate (yellow sticks) are also shown.

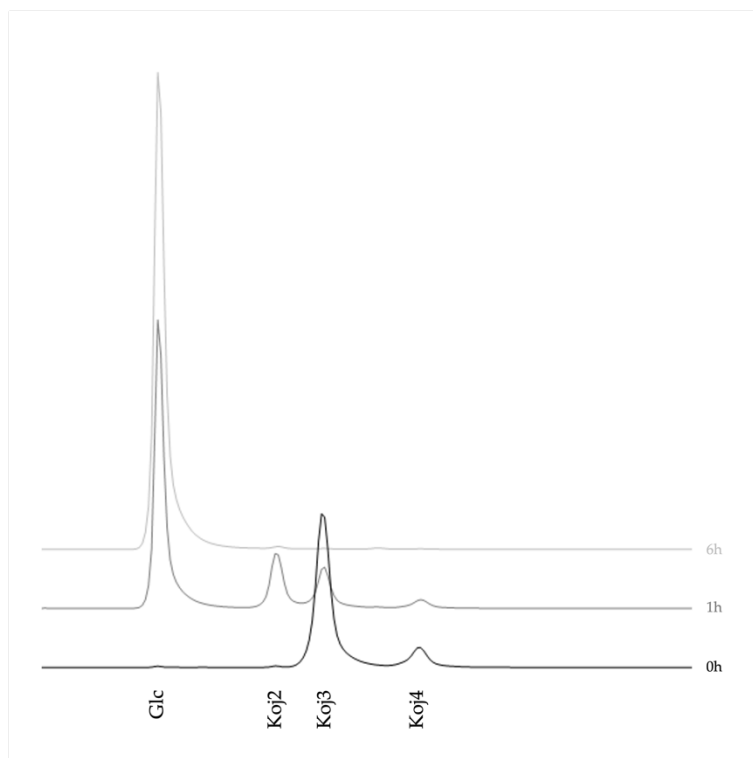

**Figure S5.** Hydrolysis of  $\alpha$ -1,2-oligoglucans by *MmGH*. The reaction was performed with ~50 mM kojitrise and ~5 mM kojitetraose and 0.1 mg/mL purified enzyme in 100 mM sodium acetate buffer (pH 4.5) at 30 °C. Samples were taken at the start of the reaction and after 1 and 6 hours (bottom to top chromatogram in overlay) and were analyzed with HPAEC-PAD. Glc: d-glucose, Koj2: kojibiose, Koj3: kojitrise, Koj4: kojitetraose.

**Table S1.** Acceptor profile of six GH65 glycoside phosphorylases in the synthetic direction of the reversible reaction. +++: very strong activity; ++: strong activity; +: moderate activity; +/-: low activity; -: no activity. None of the tested enzymes showed activity on fructose, lyxose, mannose, tagatose, L-rhamnose, cellobiose, lactose, lactulose, melibiose, arabinol, erythritol, galactitol, glycerol, man-nitol, ribitol, sorbitol, xylitol, galactosamine, N-acetylgalactosamine, N-acetylglucosamine or N-acetylmannosamine.

| Acceptors                 | TbGP | ChGP | HoGP | CaGP | MiGP | PrGP |
|---------------------------|------|------|------|------|------|------|
| Arabinose                 | -    | -    | -    | -    | -    | +/-  |
| Galactose                 | -    | -    | -    | -    | +/-  | +++  |
| Glucose                   | +++  | -    | +++  | -    | +/-  | +++  |
| Psicose                   | -    | -    | -    | -    | -    | +/-  |
| Ribose                    | -    | -    | -    | -    | -    | ++   |
| Xylose                    | ++   | -    | +    | -    | -    | +++  |
| L-arabinose               | -    | -    | -    | -    | -    | +++  |
| L-fucose                  | -    | -    | +/-  | -    | -    | -    |
| L-ribose                  | -    | -    | -    | -    | -    | +    |
| L-sorbose                 | -    | -    | +/-  | -    | -    | -    |
| L-xyllose                 | -    | -    | +    | -    | -    | +    |
| Gentiobiose               | -    | -    | +++  | -    | -    | +    |
| Isomaltose                | -    | +    | +++  | -    | +++  | -    |
| Isomaltulose              | -    | +/-  | +++  | -    | +++  | -    |
| Kojibiose                 | -    | +++  | +++  | -    | ++   | -    |
| Maltose                   | -    | +++  | +++  | -    | ++   | -    |
| Maltulose                 | -    | +/-  | -    | -    | ++   | -    |
| Nigerose                  | -    | +++  | +++  | -    | ++   | -    |
| Sucrose                   | -    | -    | +    | -    | +    | ++   |
| Trehalose                 | -    | -    | +    | -    | +    | -    |
| Turanose                  | -    | +++  | -    | -    | +    | -    |
| $\alpha$ -methylglucoside | -    | +/-  | +/-  | -    | ++   | -    |
| $\beta$ -methylglucoside  | -    | +/-  | +/-  | -    | -    | -    |
| Glucose 6-phosphate       | -    | -    | -    | +++  | -    | -    |
| water                     | -    | -    | +    | -    | -    | -    |

**Table S2.** Comparison of the substrate profile of all  $\alpha$ -glucosidases with hydrolytic activity on kojibiose reported in the BRENDA database [64] and *Mm*GH. ++: preferred substrate for hydrolysis; +: hydrolysed substrate; -: substrate is not hydrolysed. Glc-Gal-Hyl:  $\alpha$ -glucosyl-1,2- $\beta$ -galactosyl-L-hydroxylysine, MU $\alpha$ Glc: 4-methylumbelliferyl  $\alpha$ -glucoside, *p*NP: *p*-nitrophenyl.

| EC        | Name                                                                                       | Organism of origin                         | Substrates                  |         |                        |            |                           |          |              |                                |           |         |          |              |          |        |           |            |             |         |         |          |          |        |                        |                           |                            |                         |                        |                            | Ref. |                             |                 |                            |                         |                            |                                |          |             |
|-----------|--------------------------------------------------------------------------------------------|--------------------------------------------|-----------------------------|---------|------------------------|------------|---------------------------|----------|--------------|--------------------------------|-----------|---------|----------|--------------|----------|--------|-----------|------------|-------------|---------|---------|----------|----------|--------|------------------------|---------------------------|----------------------------|-------------------------|------------------------|----------------------------|------|-----------------------------|-----------------|----------------------------|-------------------------|----------------------------|--------------------------------|----------|-------------|
|           |                                                                                            |                                            | Kojibiose                   | Maltose | Malto-oligosaccharides | Isomaltose | Isomalto-oligosaccharides | Nigerose | Nigerotriose | 4- $\alpha$ -nigerosyl glucose | Trehalose | Sucrose | Leucrose | Isomaltulose | Turanose | Panose | Isopanose | Melezitose | Amylopectin | Amylose | Dextran | Glycogen | Pullulan | Starch | $\beta$ -limit dextrin | Ethyl $\alpha$ -glucoside | Methyl $\alpha$ -glucoside | pNP $\alpha$ -glucoside | pNP $\beta$ -glucoside | Phenyl $\alpha$ -glucoside |      | $\alpha$ -glucosyl fluoride | MU $\alpha$ Glc | Methyl $\alpha$ -maltoside | pNP $\alpha$ -maltoside | Phenyl $\alpha$ -maltoside | Methyl $\alpha$ -maltotrioside | Maltitol | Glc-Gal-Hyl |
| 3.2.1.3   | Glucan 1,4- $\alpha$ -glucosidase (glucoamylase)                                           | <i>Aspergillus awamori</i>                 | +                           | ++      | ++                     | +          | +                         | +        | -            |                                |           |         |          | +            |          |        | +         |            |             |         | +       | +        | +        |        |                        | +                         |                            | +                       |                        |                            |      |                             |                 |                            |                         |                            |                                | [65]     |             |
| 3.2.1.10  | Oligo-1,6-glucosidase (isomaltase)                                                         | <i>Parageobacillus thermoglucosidasius</i> | +                           | -       |                        | ++         | ++                        | +        |              |                                |           |         |          | +            |          |        |           |            |             |         |         |          |          |        |                        |                           | +                          |                         |                        |                            |      |                             |                 |                            |                         |                            |                                | [66]     |             |
| 3.2.1.20  | $\alpha$ -glucosidase (maltase)                                                            | <i>Allium fistulosum</i>                   | +                           | ++      | +                      | +          |                           |          | -            | -                              |           |         |          | +            |          |        |           | +          |             |         | +       | -        | +        |        | -                      |                           |                            | +                       |                        |                            |      |                             |                 | +                          |                         |                            | [67]                           |          |             |
|           |                                                                                            | <i>Apis cerana japonica</i>                | +                           | +       | +                      | -          |                           | -        |              |                                |           | ++      |          |              |          |        |           |            |             |         |         |          |          | -      |                        |                           | +                          |                         |                        |                            |      |                             |                 |                            |                         |                            |                                | [68]     |             |
|           | <i>Apis mellifera</i>                                                                      | +                                          | ++                          | ++      | -                      |            | +                         |          | -            | +                              |           |         | +        | -            |          |        |           |            |             |         |         |          | -        |        | -                      | +                         | +                          | +                       |                        |                            |      |                             |                 | +                          |                         |                            |                                | [69]     |             |
|           | <i>Aspergillus nidulans</i>                                                                | +                                          | ++                          | ++      | +                      | +          | +                         |          | +            | +                              |           |         |          | +            |          |        |           |            |             |         |         |          | +        |        |                        | +                         |                            |                         |                        |                            |      |                             |                 |                            |                         |                            |                                | [70]     |             |
|           | <i>Aspergillus niger</i>                                                                   | +                                          | ++                          | ++      | +                      |            | +                         |          |              |                                |           |         |          |              |          |        |           | +          | +           | -       | -       | +        | +        |        |                        |                           |                            | +                       |                        |                            |      |                             | +               |                            |                         |                            | [71]                           |          |             |
|           | <i>Bifidobacterium longum</i>                                                              | +                                          | +                           | ++      | +                      |            | +                         |          | -            |                                |           |         |          |              |          |        |           | -          | -           |         |         |          | -        |        |                        |                           | +                          |                         |                        |                            |      |                             |                 |                            |                         |                            |                                | [72]     |             |
|           | <i>Entamoeba histolytica</i>                                                               | +                                          | +                           |         | +                      |            | ++                        |          | +            |                                |           |         |          |              |          |        |           |            |             |         |         |          |          |        |                        |                           |                            |                         |                        |                            | +    |                             |                 |                            |                         |                            |                                | [73]     |             |
|           | <i>Equus caballus</i>                                                                      | +                                          | ++                          | ++      | +                      |            | +                         |          | -            | -                              |           |         |          |              |          |        |           |            |             |         |         |          | +        |        |                        |                           | +                          |                         |                        |                            |      |                             |                 |                            |                         |                            |                                | [74]     |             |
|           | <i>Mortierella alliacea</i>                                                                | +                                          | +                           | +       | +                      |            | +                         |          | +            | +                              |           |         |          |              |          |        |           |            | +           | +       | +       | +        | +        | ++     |                        | +                         | +                          |                         |                        |                            |      |                             | +               |                            | +                       |                            |                                | [75]     |             |
|           | <i>Mucor javanicus</i>                                                                     | +                                          | ++                          | +       | -                      |            | +                         |          | -            | -                              |           |         |          | -            | -        |        |           |            |             | +       | -       |          | +        | +      |                        | -                         |                            | -                       |                        |                            |      | +                           |                 | +                          | +                       | -                          |                                | [76]     |             |
|           | <i>Oryza sativa</i>                                                                        | +                                          | ++                          | ++      | +                      |            | +                         |          |              |                                |           |         |          | +            |          |        |           |            | +           | -       | +       |          | +        | +      |                        |                           | +                          |                         |                        |                            |      |                             |                 | +                          | +                       |                            |                                | [77]     |             |
|           | <i>Panicum miliaceum</i>                                                                   | +                                          | +                           | +       | +                      |            | +                         |          |              |                                |           |         |          |              |          |        |           | ++         | +           |         |         |          | +        |        |                        |                           |                            | +                       |                        |                            |      |                             |                 |                            |                         |                            |                                | [78]     |             |
|           | <i>Purpureocillium lilacinum</i>                                                           | +                                          | +                           | +       | +                      |            | ++                        |          | +            | -                              | -         |         |          |              |          |        |           |            | +           | -       | +       | -        | +        |        |                        |                           | +                          |                         |                        |                            |      |                             |                 |                            |                         |                            |                                | [79]     |             |
|           | <i>Schizosaccharomyces pombe</i>                                                           | +                                          | ++                          | ++      | +                      |            | +                         |          |              |                                |           |         |          |              | +        |        |           |            |             |         |         |          | +        |        |                        |                           |                            |                         |                        | +                          |      |                             |                 | +                          |                         |                            |                                | [80]     |             |
|           | <i>Sulfolobus acidocaldarius</i>                                                           | +                                          | ++                          | ++      | +                      | +          | +                         |          | -            |                                |           |         |          |              | +        |        |           |            |             |         |         | -        |          | +      |                        |                           | +                          |                         |                        |                            |      |                             |                 |                            |                         |                            |                                | [81]     |             |
|           | <i>Sus scrofa</i>                                                                          | +                                          | ++                          | ++      | +                      |            | +                         |          | -            | -                              |           | +       | +        | +            | +        | +      |           | +          | +           |         | +       |          | +        |        |                        | +                         | +                          | +                       | +                      |                            |      |                             |                 |                            |                         |                            |                                |          | [82]        |
|           | <i>Thermoplasma acidophilum</i>                                                            | +                                          | ++                          | ++      | +                      | +          | +                         |          | -            |                                |           |         |          |              | +        |        |           |            |             |         |         |          |          |        |                        |                           | +                          |                         |                        |                            |      |                             |                 |                            |                         |                            |                                |          | [83]        |
|           | <i>Thermus thermophilus</i>                                                                | +                                          | +                           | +       | +                      | +          | +                         |          | ++           | +                              | +         | +       | +        | +            | +        |        | -         | -          |             |         |         | -        | -        | -      |                        |                           |                            |                         |                        |                            |      |                             |                 |                            |                         |                            |                                | [84]     |             |
|           | <i>Zea mays</i>                                                                            | +                                          | ++                          | ++      | +                      |            | +                         |          |              |                                |           |         |          | +            | +        |        |           |            | +           |         |         |          | +        |        |                        |                           |                            |                         | +                      |                            |      |                             |                 |                            | +                       |                            |                                |          | [85]        |
|           | 3.1.2.70                                                                                   | Glucan 1,6- $\alpha$ glucosidase           | <i>Streptococcus mutans</i> | +       | +                      | +          | ++                        | ++       | +            | -                              | +         |         |          |              | ++       |        |           |            |             |         | +       |          |          |        |                        |                           | +                          | +                       |                        |                            |      |                             |                 |                            |                         |                            |                                |          | [86]        |
| 3.2.1.106 | Mannosyl-oligosaccharide glucosidase                                                       | <i>Escherichia coli</i>                    | +                           | +       | +                      |            |                           | ++       | +            | +                              | +         |         |          |              |          |        |           |            |             | -       | -       | -        | +        |        |                        |                           |                            |                         |                        |                            |      |                             |                 |                            |                         |                            |                                | [87]     |             |
| 3.2.1.107 | Protein- $\alpha$ -glucosyl-1,2- $\beta$ -galactosyl-L-hydroxylysine $\alpha$ -glucosidase | <i>Rattus norvegicus</i>                   | +                           | +       |                        | +          |                           | +        | -            | -                              |           |         | -        |              |          |        |           |            |             |         |         |          |          |        |                        | -                         | -                          | -                       |                        |                            |      |                             |                 |                            | ++                      |                            |                                | [45]     |             |
| 3.2.1.207 | Mannosyl-oligosaccharide $\alpha$ -1,3-glucosidase                                         | <i>Sporothrix schenckii</i>                | +                           | +       |                        | +          | ++                        |          | +            |                                |           |         |          |              |          |        |           |            |             |         |         |          |          |        |                        |                           |                            |                         |                        |                            |      | +                           |                 |                            |                         |                            |                                | [88]     |             |
| 3.2.1.x   | Kojibiose hydrolase                                                                        | <i>Mucilaginibacter mallensis</i>          | ++                          | -       |                        | -          | +                         |          | -            | -                              |           | -       | -        |              |          | -      |           |            |             |         |         |          |          |        |                        |                           |                            |                         |                        |                            |      |                             |                 |                            |                         |                            | This study                     |          |             |

**Table S3.** Nucleotide sequences encoding the enzymes expressed in this work. All sequences were codon-optimized for expression in *E. coli*.

| Enzyme      | Codon-optimized sequence                                                                                                                                                                                                                                                                                                                                                                                                                                                                                                                                                                                                                                                                                                                                                                                                                                                                                                                                                                                                                                                                                                                                                                                                                                                                                                                                                                                                                                                                                                                                                                                                                                                                                                                                                                                                                                                                                                                                                                                                                                                                                                                                                                                                                                                                                                                                                                                                                                                                                                                                                                                                                                                |
|-------------|-------------------------------------------------------------------------------------------------------------------------------------------------------------------------------------------------------------------------------------------------------------------------------------------------------------------------------------------------------------------------------------------------------------------------------------------------------------------------------------------------------------------------------------------------------------------------------------------------------------------------------------------------------------------------------------------------------------------------------------------------------------------------------------------------------------------------------------------------------------------------------------------------------------------------------------------------------------------------------------------------------------------------------------------------------------------------------------------------------------------------------------------------------------------------------------------------------------------------------------------------------------------------------------------------------------------------------------------------------------------------------------------------------------------------------------------------------------------------------------------------------------------------------------------------------------------------------------------------------------------------------------------------------------------------------------------------------------------------------------------------------------------------------------------------------------------------------------------------------------------------------------------------------------------------------------------------------------------------------------------------------------------------------------------------------------------------------------------------------------------------------------------------------------------------------------------------------------------------------------------------------------------------------------------------------------------------------------------------------------------------------------------------------------------------------------------------------------------------------------------------------------------------------------------------------------------------------------------------------------------------------------------------------------------------|
| <i>TbGP</i> | ATGATTCTGTCATCCGGCATTTCATGTGATCCGTGGCAGGTTTGTGAAAAAACCTTGAGCCTGGATGTTCTGGCACAGACCGAAAGCATTTTTCGACTGAGCAATGGTCATA<br>TTGGTCTGCGTGGAATCTGGATGAAGGTGAACCGCATGCACTGCCTGGCACCTATCTGAATAGCGTTTATGAACTGCGTCCGCTGCCGATATGCCGAAGCAGGTTATGGTTA<br>TCCGGAAGCGGTGAGACCGTTGTTAATGTTACCAATGGTAACTGATTTCGCTGCTGGTTGATGATGAACCGTTTATGTTTCGTTATGGCACCTGTCATGAACATGAACGT<br>GTTCTGGATATGCGTGCAGGTACACTGACCCGTCGTGTTCTGGTGTAGTCCGGCAGGCGGTGATGTTCTGATTACCAGCACACGTCTGGTTAGCTTTACCCATCGTGCAG<br>TTGCAGCAATCAAATATGAAGTGAACCGGTTGATCGTCCTCTGCGTGTGTTGTTTCAGAGCGAACTGGTTGCAAAATGAAACCGTTCCGCGTATTGATGCAGATCCGCGTGC<br>CGGTGCACTGATTCGCAGACCGCTGGTTCTGGAAGAAAAATATCCGGCAGCCGAAGGTGCAGCCGTTATGGTTCATCGTACCCTGTTAGCGGTCTGCGCGTTGCAGCAGCA<br>ATGCGTCATGAAGTTGATGGTCCGACGGCACCCGTAATTGAAGCCGATGGTGAAGGTGATGTTAGCCGTGTTACCGTTGCAACCCGCTGCTGCGCAGGTGAGCGTCTGCGTC<br>TGATTAATAACATTGGCTATGGTTGGAGCGCAGTTTCGTAGCCGTCCGGCACTGCATGATCAGGTTGTTGCAGCACTGGCAGCAGCCAACTGACCGGTTGGGATGGTCTGTG<br>TGCAGAACACGCGTAATTTCTGGATGAGTTTGGGCAGGCGCAGATGTTGAACTGGAAGATGATGAAGAAGTTCAGCAGGCAAGTTCGTTTTGGTCTGTTTCATCTGCTGCAA<br>GCGGGTGCACGTGTTGAACAGCGCCTGATTCCTGGTAAAGCCTGACCGGTAGCGGTTATGATGGTCATGCATTTTGGGATACCGAAGGTTTTGTTCTGCCGGTTCTGACCT<br>ATACCTATCCTCGTGCAGCAGCCGATGCACTGGCATGGCGTCTGAGCATTCTGCCGAAAGCAGCTGCCCGTGCAGCACAGCTGGGTTTAGAAGGTGCCGCATTTCCGTGGCG<br>TACAATTAATGGTGAAGAATGCAGCGTTATTGGCCAGCAGCACCGCAGCATTTTCATGTTAATGCCGATATTGCAGATGCCGTGATTCTGTTATGTTGATGCAACCGAAGAT<br>GTTGGCTTTGAACGTGATGTTGGTCTGCCGCTGCTGGTAGCAACCGCAGCTCTGTTGGTGTAGCCTGGGTTTTTTTGGTCCGGATGGTCGTTTTTCGCATTGATGGTGTACC<br>GTCTGATGAATATAGCGCAATTCTGTGATAATAACGTGTTACCAATCTGATGGCACGTCGTAATCTGCTTGCAGCCGAGCAGCAGCGGAACGTTATCCGGCAGATGCAGA<br>ACGTCCTGGGTGTTGCACCGGAAGAAATGCAAGTTGGCGTAAAGCAGCCGTGCAATGTATATCCGTATGATGAACGCTGGGCGTGCATCCGCAGCATGAAGGTTTTACC<br>CAGCACGAAGTTTGGGATTTTGCAAGCACCCGTCCGGAACAGTATCCTCTGATGCTGCATTTTCCGTATTTTGAGCTGTATCGTAACAGGTTGTTAAACAGGCAGATCTGG<br>TGCTGGCAATGCATCTGTGTAGCGATTGTTTTACACCGGAACAGAAAGCAGCAACTTTGCATACTATGAAGCACTGACCGTTTCGTGATAGCAGCTGAGCGCATGTACCCA<br>GGCCGTTCTGGCAGCGGAAGTTGGTTTTCTGGAACGGCCTATGCATATCTGGGTGAAGCAGCACTGATGGATCTGCGTGATCTGCAGAATAATACCCGTGATGGTGTGCAC<br>ATGGCAAGCTTAGCCGTGCGTGGCTGGCACTGGTTGCCGGTTTTGGTGGTATGCGTGCCGATAATGGTGTATTTCGTTTTGCACCGCGTCTGCCTGCACTGCTGCGTCGTC<br>TGGCATTTCTGCTGCGTTATCTGGTGGTCTGTTAGCAGTTGAAGTTACTCCGGAACGTACCGTTTTATCGTTTACTGGATGGTCCTCCGCTGACCATGGTTCAATTATGACGA<br>AGAAATACCTGAGTGATGAAGCAACACGTCCGACTCCGGAAGTTCGTCCGCCTGATATTGAAATTCGTGAGCCTCCGGGTGCTGAACCGCTGCCTCGTGTCCGTTTCGT<br>GGTTGTGCAGCCCTGCCTGGTCGTTACCCGCGAGCTGGCGGTGCTCCTGGTCCTGCAGCAGGTCCGGGTGATCGTAAAGGTCCGGAAGCCGGTGGTCTGCGGGTGATCCGG<br>AAACCGCACTCGAGCACCACCACCACCACCTGA |
| <i>ChGP</i> | ATGATCAACAAAAAGGCAGCCGCTATGTTAAAGTTGATCCGTGGTGTATTATCGAAGAGAACTTCGATAAAAGCAATATGCGTGTCTTGAAAGCCTGTTTACCGTTAGCA<br>ATGGTTATATTGGCACCCGTGGTTATTTTCGATGAATTCTATACCGGTGATACCCATATTGGTACGTATGTTGCCGGTGTGTTTGAAGAGATTTATGAGAAACCGAGCTATAA<br>AGGTGTTCCGAATCGTACCCAGTTTGTGTGAATAATGCAAACTGGCTGTATACCCGTATTATTGCAGATGGTGAAGAACTGGATCTGAACCATAGCAACTTTAGCGAATAT<br>AAACGTGTGCTGGACCTGAAAAAAGGTATTCTGACCCGTGAATTTATCTGGCATACCGAAAAAGGTAGCAGCTTCAAACCTGAAATTTGAACGCTTTATCAGCATGACCAAAA<br>GCAATGTTTGTCTGCCAGAAAATTGAAATCACCAGCCTGAATAAAGCGGCAAGGTGAAAAATTATCAGCGGTGTGGATTTTAGCCATAAACACCGTATTATGACACCAACTA<br>TTGGGAAGGTCTGTTCAAATCCAACGAGAACGATTACATTAGCATTTGGCTGCAAAACCATCAAGACCAACAAAATCAGCATTGCCAACTTTAAAAATCGAGGCCAATAAAGCA<br>TGTGAACAGGATATTGTTGAAGCGCAAAAAATCATTGCCAAAGAAATGGTGTTTGACATCGAGGAAAAACGAAACCATCGAAATCGAAAAAGTGGTGGTGATCAATAGTTTTG<br>ATCGCCTGAATGAAACCTGCAGAGCAAAAAATGGTAACTGTGTGAGAGCGTTTTTGGCCAGTATAGCTATTTCGAAACTGAAACAAGAACCGAACGTTTTTGGGAACGTAT<br>GTGGGAAGAAGTGGATATTGAAATTTGGTCAGGATAGCGAAAAACGAGGGTATTTCGTTTTTGCATTTTTCAGATGCTGCAGGCATATAGCGGTATGCAGCAGGTTGTTGCA<br>GGTATTGGTGCAAAAGGTCTGAGCGGTGAAGTTTATAATGGTAACAGCTTTTGGGATAGCAGGTTTTATTGTCTGCCGTTTTACCTGTTACCAATATTGATGCAGCAAAAG<br>AACTGCTGGAATTCCGTTATTATACCTGCGCGCAGGCACAGCAGCGTGCAAAAGAAATTAGATCTGAAAGGTGCCTTTTATCCGATTGCAACCAATTGATGGCACCGGAAAGCTG<br>TACCTGTGGCAGCATGCAAACTGCAACTGCAGGTTAGCACCGCAGTTGCCTATGGTCTGTATCATTATTACATCGTGACCAAGGATGAGAAGTTCCTGTTTGAAGAAAGGC<br>ACGGAAATTCGTATTGAAGTTTGTGCTATGCTGGAAAGTCGTGTGTCAGCTGGGTGAGAAAGATGGTAAATATGGTTTTTTTGGTGTGATGGGTCCCGATGAATTTACATGA<br>TGGTTAACAACGATTTCTATACCAACTATATGGCCAAGAAAAGCCTGGAATTTACCATTGAAGTGCTTAACTGCTGAAAGCCAAAAGACGAGAAACTGTATAATGAGATTAC<br>CCGCAAAACCAAACTGGAACGTAATGAAGTTGAACGCTGGGCAGATATTGCCAAAAACATGAAATCATTCAGGATCCGCAGAGCAAGGTTTTTGAACAGCATGAAGGCTAT<br>TTTAACTGCCGCATATTGAACTGAGCACCATTCCGGAAGATCAGATTCCGATTTACAAAAACTGGGCCTATGATCGCATCTTCCGCTATGATATGATTAAACAGCCTGCAG<br>TTCGTGCTGTATGCTGCTGTATAGCTGTGATTTTAGCTTTGAAGAAAAAAGCCAACTACGATTATTACGATCTGCGCTGTATTTCATGAAGACGAGCTGAGTCCGAGCAT<br>TCATAGCATTTCTGGCCTGTGAACCTGGGCTATTATGATAAAGCCTATGAGTATTTTCGTTACGCAACCCGTCTGGATCTGGATAACTATAATCGTAATACCGAAGAAGGCTG<br>CATATTACCAGCCTGGCAGCAGCATGGCTGAATATTGTTTATGGTTTTTGGTGGTATGCGTAGCGATACCGACCGATTAACTGGCTCCGATTATTCCGGATAACTGGTCCT<br>ATTATAGCTTCCGCATTAATAACAATGGTGCCGTGCTGAAAAATTGTTGTTGATCCGAGTATGTGACCATCAAAAACTGAAAGGCGCAGATGTTGAACTGATGGTGTATGA<br>TAAACGTATACCATCACCGAGGACGAAATCAAAATTCGCTGCAGAAACGTGCGCTCGAGCACCACCACCACCACCTGA                                                                                                                                                                             |



$H_oGP$ 

*CaGP*

MiGP

ATGCGTCAGGATACCATTCGAAACCGTGGCAGATTGAACTGACCACCAATAGCACCAAAGATAGCTTTGAAGAAAGCATCTTTTTTACCGCAATGGTCGTATGGGTATTC  
GTGGTTATCTGCGGTTTTTGGCAAGAAAAACGTACCTTTGAAACCGGTCTGTTTGTGTGCAGGTATTTTTTGGTGAAATTAAACCGGGTATCACCGATTTTGTTAATCTGCCGAC  
ACCGGTTTTGGGGTAGCATTGAATGTGTATGGTCATCCGATTACACTGAGCAGTCCGGTTCATAGCACCTGGATATGAAAACAGGTGTTCTGTAGCCAGAGCTTCTGGTTGAA  
AGCGGTGAAACCACACTGAATATTGAACATCGTGTGTTTTGCAGCATTAGCGATCCGAGCCTGCTGGTTCAGCAGCTGAGCTTTAGCGCAAGCCGTACCAGCGATATTACCG  
TTCATGCAGGCATTAATACCGCCTGTTGTAATTGTCCGATTCCGGATGATCAGGTGAAAGAAAATCATGAAACCATCAAACCTGGCCAAGCTGACCAATAAAGATCTGCAGAA  
AGATAGCGTTAGCTGCACCTTTAGCATTCCTTGGCACAGGTCTGATTGTGAAAGAAACAAATGATTTTCCATAGCAGCTTTGCCAAAAGCGAGGATTACATTAGTGATGATAGC  
ATTGGTAAACAGTGGTGTGGTGTCTTCGAGAGCGGTGAGAAATTTATCCTGGAAGCAACACACGTATTACCACAGTCGTGATATTGATAGCCTGATTGGTAGCAACGAAA  
TCAGCGATACCTATGATGAACTGTTTGCAAAAAGCAGCCTGGCATGGGCAAGCCGTTGGAGCGAAAGCGATATTGAAATTGAAGGTGCCCTGATGATCAGAGCGCAGTTCTG  
TTATAACATTTTTTCAGCTGATTACCAGCTGTAGCGCACGTGATAGCAGCGTGAGCATTGGTGCACGTGGTCTGACCCATACACGTTATAAAGGTTGTTATTTTTTGGGATACC  
GATTTCTTCATGCTGCCGTTCTTTCTGTATACCATCCGGAAGCAGCAAAAAGCCTGCTGATGTATCGTGTTAAACCCCTGCCGAGGCAAAAGAAAATGCCAAAAAATGA  
ATAACTATGGCGCACGTTATCCGTGGATGACCTCATTTGATGGTAGCGAACAGTGTGAAAGCTGGGATATTGGTGCAAGCGAACTGCATATTACCAGCAGATATTCCGTTTGC  
AATGCAGCAGTATTTTAGCGCCACCGATGATGAAGATTTTATCTGCAGGCAATGGAAGTGTGATTGAAACCGCACGTTTTTGGTATAGCCGTTGTATTATTCATCTGTAT  
GGTAGTGCAGATCTGATGTTTTGTAAAGGTCCGGATGAATATTGTGGCATCACCAACAATAACCTGTTTACCAATTGTATGGTGAAGTTCAACATTGATCTGGCCATTAAATG  
CAGCCCTGAAACTGAAAAAGCAGATCCGGTCTGCTATACCGAACTGAGCCTGAGTGTGAAAGAGTACTGACCTGGCATAGCCTGCGTGTATACTGAAAGAAATGTCGTGA  
TAGCCAGACCGGTCTGCTATCTGCCGGATGAAACCTTTGCACGTCTGGAACCGGTGGATATCAAACCCCTGAAAACCGATGATAGCGCCAGTTATCATCATGTTTGTGTTGAT  
CGTCTGCAGCGCTATCAGGTTATTAACAGGCAGATACCTGCTGCTGATGAGCCGTATGCCGAAAAAATTCACCTATATGGAACGCTGAATGCCTGGGAAGATTTTGAAC  
CGTGTTGCTCTGCATGATAGTACCTGAGCTTTGCAAGCCATGCACTGTTTGC CGCACAGAATGGTCTGCAGAGTGCAGCAGAAAAATATCTGAAAAAGGCACTGTATCTGGA  
TCTGCATGAAGTGTGATAAACCACCGGTAAGAGGGTCTGCATCTGGCATGCTCGGGTGAAACCTGGTCAAGCATTCGTGTTGGTTTTCTGGGTGCAAAATTTTGATAGCGGT  
ATTCGACCTTTAGTCCGAGTCTGCCGAGCAGCTGGAAGCACTGAAAATGAACTTTTATTTGGAAGGCAGCCAGTATCAGATTGTTGTTAGCGAAGGTCGTAGCAGCGTTA  
GTAAAGTTCTCGAGCACCAACCACCACCACCTGA

KgGP

ATGACCGATGGCGAAAAAGATATTGCAGCAAGCGCAGATGCGAGCGTTGGACCATTTGAAGAACATTCATATCATCCGCGACGTGAACCGTTAGGTGGCACCCAGTATTGTA  
TTGGTAATGGTTATATGGGTCTGCGTGGTAGCTATGAAGAACTGGGCACCAAAGATGTTTCAGGGTCTGTTTTGTTGCCGGTGTTTTTCATCGTCTGCTGCGTAACAGTTTTG  
TCGTGCAGATACCTTTTGTGCGAAACAGTATATCTTTGATGAAGAGGCAATGACCACACCGGAAGAAATTTGTGAAATTGAGAATCTGCCGGATCCGCTGTTTGTTCAGATG  
CAGGTTTCATGATCGTCCGTTTTCGCTCTGGGATGGTGAACGTGCTGGAATATCGTCTGCGCTGGATCTGCGTACCGGTGAACCTGGTTCGTACCGTTTCGTCTGTATGATGGCG  
AAGGTCGTATTACCCGTTTTTGAATTTTCGTGTTTTTGTGGTATGGATCGTCTCATCTGATTATGCAGCGTATTGTGTTTACACCGGAAAAATCATGATGCAGTTCTGGCATT  
TCGTAGCGGTATTGATGCAAGGTCTGAATGATACCTGTGAAGATACCATTCACGAAGAGGCAGAAGATGGTTTTACCTTGCCTAGCACCCCTGCCGAGCACCGGTGTTAGCGTT  
TTTTAGGCAGTTTCGTATCTGTTCTGTCAGATGGTCTCTGCAGATCCGGCATGGTTCACGTGGTGAACGTCTGCGTCTCATACCGCAAGCACCCGTCTGGAAGTTGCAA  
AAGGTGAAACCGTTGTTCTGGAAAAAGCTGTGCACTGTATAGCAGCCGTATCCTGATCTGGATGATCCTGCAGAAGCAGCAGTTGAACTGGCAGATCGTGCAGCAGCCGA  
AGGTTATGATGCAGCATTGGTAGCCATGCCGAAGCATGGCGTCGCCGTGTGGCGTGAAACCGATATTCGTATTGAAAATGGTCCGGATGATCAGCGTATGATTGTTTTGCA  
ATTTTTTACCTGATTATCGCAAGTCCGCATCCGGATAGCAGCGTTAGCATTTGCAGCCAAAAGCCTGAGCGGTTATGGTTATGGTGGTTGTGTTTTTGGGATGATGATATTA  
ATCTGGCACCGTTTTATCAGTGGGCACTGCCGGAATATGCACGTAGCCATCATCGTTATCGTACCCGTATGCTGGATGCAGCAGCTGAATATGCCCAGAGTGAAGGTCGTGA  
AGGTGCACGTTATCCGTGGCAGAGCAGCGTGAGCGGTGATGAACATGCACCGGTTAGCATTAATTGTAGTCTGATCCAGATTTCATGTTGTTCGGATGTTGCACATAGCATT  
TTTCGTTATGCAGCAACAGCGGTGATCGTGAATTTCTGTATCGTTCATGGTCTGGAAGCCGAGTGGAAGCAGCCGTTATATGATGCAACGTCGTTGTCGCCATGAAGCCG  
AAGATCGTTATGAAATTCATGGTGTGGTGGACCGGATGAATATCATCCTATTACCAACAATAACGCCCTATACCAATTGGACCACCGCAGAAGTTCTGCTGCGCACCGCAGA  
TGCCCTGGATGCACTGCGTGCCGAAGATGCCGATCGTGCCCGTGAACCTGGAAGCAGCTGTCAGCTGCGTGACGGTGAACCGGCACGTTGGCGTGAAGCAGGTGAGAAAAATG  
TTTCGTCGCGGTGATGAAACCACCGTCTGATTCCGCAGTGTGATGGTTTTTTTTGATCTGCAAGATGATTGGGAACGTGTTGGTAGCGATTGGGGTGGTCCGGGTGCAGAAT  
ATCACCGTTGTAAAGGTATTAACAGCCGGATGTTATCTGCTGCTGACCCGTGTTTCCGGAACAGTTTGAACGTCGTGATTGGGTTGCAAACTGGGATTATTATGAACGCTT  
TATTCTGCATGGTAGCAGCCTGAGTCCGAGCATTCATGCACTGGCAGCAGCAAAAATGGTCTGGTTGAGCGTGCCCGTTATTACTTTTCGTCTGGCAGGTAGCTTTGATTTT  
GAGGATTATAACAATGATAGCGAAGCCGGTATTATATTGGCAATTGTGGTGGTCTGTGGCAGGCAGCAATTTATGGTTTTTGCCGGTCTGGAACGCGTGGTGGTATACCTGT  
ATTTTGATCCGCATCTGCCGTAAGAATGGGGTGCAATTAGTTTTCTGCTGCAATTTTCGTGGTCAGGCCGTTGATGCAGCCGTGCGTAGCGGTGGTGTGAAATTCGTGCCGA  
TGAAAGCAATCCGGCACCGGTTTCGTATTGGTGGTTTTTGGTCTGATGAAAGTTTCGTGCGGGTGAAACCAAGAACTGACAGGTCATGCAAGCCTCGAGCACCAACCACC  
CACCACCTGA

|             |                                                                                                                                                                                                                                                                                                                                                                                                                                                                                                                                                                                                                                                                                                                                                                                                                                                                                                                                                                                                                                                                                                                                                                                                                                                                                                                                                                                                                                                                                                                                                                                                                                                                                                                                                                                                                                                                                                                                                                                                                                                                                                                                                                                                                                                                                                                                                                                                                                                                                                                                                                                                             |
|-------------|-------------------------------------------------------------------------------------------------------------------------------------------------------------------------------------------------------------------------------------------------------------------------------------------------------------------------------------------------------------------------------------------------------------------------------------------------------------------------------------------------------------------------------------------------------------------------------------------------------------------------------------------------------------------------------------------------------------------------------------------------------------------------------------------------------------------------------------------------------------------------------------------------------------------------------------------------------------------------------------------------------------------------------------------------------------------------------------------------------------------------------------------------------------------------------------------------------------------------------------------------------------------------------------------------------------------------------------------------------------------------------------------------------------------------------------------------------------------------------------------------------------------------------------------------------------------------------------------------------------------------------------------------------------------------------------------------------------------------------------------------------------------------------------------------------------------------------------------------------------------------------------------------------------------------------------------------------------------------------------------------------------------------------------------------------------------------------------------------------------------------------------------------------------------------------------------------------------------------------------------------------------------------------------------------------------------------------------------------------------------------------------------------------------------------------------------------------------------------------------------------------------------------------------------------------------------------------------------------------------|
|             | <p>ATGATGAACCGTAAAAATGACCCCTGGGTAAAAAAACCGGTGAAACCGAAGGTCTGCAGATGAATGAAGAAAATCTGTGGTGTCTGAAAGAGGATGGTTATCATCCGGGTCTGC</p> <p>ATAAACATTATGAAGGTCTGTTTACCCAAGCAACGGTTATATGCATGTTCTGGTAGCTTTGAAGAAGTTGTAGCGACGCACCGCAGGATGAAGAGTATCTGCGTTTTC</p> <p>TGAAAATGTGACCCTGGA AAAACCGCGTCATCCGAAAAGCAAACAGGGCACCTTTATTCCGGGTATTGTTGGTCGTCATCCGCTGCTGAAAGAAGAAATTGTTAATCTGCCG</p> <p>TATTATCTGGGCCTTGAATTTCTGAGTGCCGGTGAACGTCTGGATATGGATCGTTGTCTGATTAGCGGTTATCAGCGTTGGCTGGATCTGCGTGATGGTAGCCTGCATCGTA</p> <p>GCGTTGTTTGGGAAACCGCAGAAGGTATGAAAATTCATTGTACCTTTACGCGCTATCTGAGCATGGCAGATACCCATCTGTGTATTACGACAGGTTACAGTGGAAAGTCTGAG</p> <p>CGGTGAAGGTAGTCTGGAAGTTAAAGCAACCCTGCGTGCAGATGTTCTGTACCAATGGTATGAATCATTATGCACGTATTGTTCCGAGCGCAGATAGCGAAGGTATTCTGAGC</p> <p>CTGGAAACCATTACCGAAGAAGGCAATCAGATTTTTATGCTGAGCGCACTGGAAGCAAGCGAAGCAATTGTTTGGCATGCAGAAAATACCCGTATGACCGCAGCACTGCGTG</p> <p>GTAATATGTCGTCTGCGTACCGGTGATCGCCTGGCAGTTAGCAAACCTGACCACC GTTACCACCAGATCAGGATATGGAAGAAGGTACAGTTCGCGATCGTGCACTGGCACATCT</p> <p>GGGTATGCACGTAATCTGGGTTTAGAACAGCTGTATAATCGTCATGCAGATCGTTGGAAAAGTAAATGGCAGCATGCCGATATTTCGATCAAAGGTGATGATGCAGCACAG</p> <p>ATTAATGTTCTGTGAAGCCTGTATCATCTGATTCTGTAGCAATGCAGAACAGGATGCACGTGTTGCAATTTGTGCAAAGGTTATGCGGGTGAAGCATATTTTGGTCGTATT</p> <p>TTTGGGATACCGAAATTAACCTGCTGCCGTTTTTCTGACACCAATCCGAGGCAGCCGTAATCTGCTGCTGTTTCGTTATAACACCCCTGGAAGGTGCACGTCGTAATGC</p> <p>CCGTAATTATGTTTATCGTGGTGACGTTATGCATGGGAAAGCAGCCTGAGTGGTGAAGAACAGTGTGCAAATTTGGCAGTATGCAGATCATGAAATTCATATACCCGAGAT</p> <p>ATTGTGTATGCCCTGTATCACTATGTTAATGCAACCGGTGATGACGAATTTCTGGAACGTTATGGTATTGATATTCTGGTTGAAACCGCACGTTATTGGTGTGATCGTGTTG</p> <p>ATTGGAATCGTGAAGGTTATGGTGAACGTGCTGGGTGTTATGGGTCTGATGAATATCTGCCGTTTACACGTAATAATGCCTTTACCAATCGCATGGTGAAATTTAGCCTGGA</p> <p>ACAGACCGTTGCATGTCTGGATAGCCTGCAGAGCGGTAAACCGGATAGCTATGCAGCAGCAGCCGAACGCCTGGGTCTGCGTCCGGATGAACGTGAACGTGTTTCTGCATACC</p> <p>GCAGAAAAACTGCGCCTGCCGTATGATAGCCAGATGGAAATTGTTCCGAGAGTGATGATTTTGACGTTTATGCCGATGTTGAATTTGATAGCCTGTGGACCGATCGTAGCC</p> <p>GTCCGTTTGGTCACTTTATTAGCCAAGAACGTAATTATCGTAGCAAAGCACTGAAACAGGCCGATGTTCTGGAACGTGATGCTGTTATTTCCGCAAGAATTTCCGCGTGAACA</p> <p>GCTGAAAGCAGCGTATGCCATTATGAACCGATTACCACACATGATAGCAGCCTGTCAAGTTGACGTTTCATGGTATTGTGGCAAGCTGGCTGAATCTTAAAGAAGAAGCCGAA</p> <p>GCATTTCTGACGCGTGTTATGGCAATTGATTTTAGTCCGGAAAAAAAGGTGCAGCCGAAGGCATTATATTGCAAAATTGTGGTGGTCTGTGGCAGCTGATTGTTTATGGTT</p> <p>TTGCCGCTCTGGCAAGCGCAATGTGGTCAGATACCATTAAACTGCAGCCTCGTCTGCCGGAAGGTTGGGAAGAAGTGAAGCTTTCAGATTGTGTGGCGTGGTGAACATTATCG</p> <p>CATTAGCGTTAATAGCGGTGCCATGAAGTTCAGAAACTGAATGGTGGTGAAGCAGTTGCAGGTACAACCATTTCTCGAGCACCACCACCACCACCCTGA</p> |
| <i>PrGP</i> |                                                                                                                                                                                                                                                                                                                                                                                                                                                                                                                                                                                                                                                                                                                                                                                                                                                                                                                                                                                                                                                                                                                                                                                                                                                                                                                                                                                                                                                                                                                                                                                                                                                                                                                                                                                                                                                                                                                                                                                                                                                                                                                                                                                                                                                                                                                                                                                                                                                                                                                                                                                                             |
|             | <p>ATGGCAGAGGATCCGTGGATTATCAAAGCCGATAAAATTGATCCGGCAAACATTATGGTGTTACCGTTGCAAATGGCATGATTGGTATTGTTAGCAGCAGCGAACCGTTTC</p> <p>AGGTTAAAAATGTTGTTCTGGCTGGTGCCTATGATATGTATGGTCGTGGTCTGTTAGCAACTTTCTGAATTCATTTAACTGCTGAACATGTATCTGCTGTTTAAACGTGA</p> <p>TGATTGGGATGCAAGCAAAGTGAAAAACATGAAACAAGAGCTGGATATGCAGCATGCAAGCTTTACCACCACCTTTGATTATGGTGATGTTGCCAGCATCAAATACACCTAT</p> <p>TATAGCCTGCGTCAGCTGCCGTTTTGTGTTCTGATGGATGTTAGCGTTACCGCAAAAAAAACCGTGAATATTACCGCAGCAAGCGTTATGCAGACACCGGATGCACCTGCGTG</p> <p>ATGTTCAAGATTATTACAATGAAGTTGATGGTCCGACAGGTCGTATTAGCCTGCTGACCAGCACC CGCAAAAGCCGACCGGTAAACTGCAGCTGTGTGCAAGCAATGCATT</p> <p>TATCTTTAATGAAGCAGATAGCCTGGCACCGCGTCTGATGCATGAAATGCTGGATAATAACATGCATAGCATGCGCTTTAGCAAAGAACTGGCAGCCGGTCAGACCTATAGC</p> <p>TATTCAGTTGTTGGTAGCAGCATTACCAGCGCACATACCACCGATCCGCTGAATGAAGCCGAACGTCGACCATTTTTCAGCTCTGCAGGGTCGTGATGGTCTGATTAAAG</p> <p>CCCATACCAAAGCATGGGCAGAAGCTGTGGAAGCGATATTAGATTGATGGTGAACCGCAGGCACAGCAGGATGTTTCATAGTATGCTGTATCATCTGTATAGCTTTAGCCG</p> <p>TGAAGGCACCGCCTATGCACCGAGTCCGATGGGTCTGAGCGGTAGCGGTTATAATGGTCATATCTTTTGGGATAGCGACCTGTGGATGTTTCCGGCACTGCTGGTTCTGCAT</p> <p>CCGGAAATTGCAAAAAGCCTGATCGAATATCGTTATGAACGTCGCGCAGCAGCAAAAAGCAATGCATTGACATAGCTTTAAAGGTGCAATGTATCCGTGGGAAAGCGCAG</p> <p>ATAATGGCACCGCAAGAAACACCGGTTGGTAGCCTGAGCGGTCCGTTTGAACATCATATTACAGCATGTGTTGCACTGGCAGCATGGAAGTATTATTGCGTGACCCAGGATAA</p> <p>ACAGTGGCTGCAAGAAAAAGGTTGGCCGATTATTAGCGCATGTGCAGATTTTGGGCAAGCCGTGTTGAACGTAATGGTCCGGGTGATGATATCAAATAATGTTATTGCA</p> <p>GCCGATGAATGGGTGAAGGCATTGATAATGATGCATTTACCAATGCAGCAGCCAAAGCAATCTGCAGTGTGCAGCCCTGGCAGCAAAAGTCTGAATGTTAAAGCAGATC</p> <p>CGGATTGGCAGCTGGTGCACAGAATATCCGATTCTGAAATTTCTGATGGCGTGACCAAGAAATTGCCAGCTATAAAGGTGGCGGTATTAAACAGGCCGATGTTAATCT</p> <p>GCTGGCATATCCTCTGAAAACCATACCAGTCCGGCACAGGTGAAAAAAGATCTGGAATTTTATGAAAGCCGATTCGGAATGAAGGTACACCGCAATGACCCAGGCAATT</p> <p>TTTACCCTGCTGTATAGCCGTTTAGGTAATGGTGATAAAGCCTACCACCTTTTCAAAGATGCCATGAACCGAATCTGAATCCGCTTTTCTGTTATTGCGCAAAACCAAAG</p> <p>GTGGCACCAATCCGTATTTTGAACCCGGTGCCGGTGGTATTATTAGAGTCTGCTGATGGGTTTTGGTGGTCTGGATATTACCCGGAATGGTATTACCAGGTGAAATCAAC</p> <p>CCTGCCGAGCAATTGGAAGAAGTATTACCATTACAGGTGTTGGTCCGGAAAAAAAGACCTATGTTGTGAAACTCGAGCACCACCACCACCACCCTGA</p>                                                                                                                                                                                                                                                                                                                                                                                                   |
| <i>MmGH</i> |                                                                                                                                                                                                                                                                                                                                                                                                                                                                                                                                                                                                                                                                                                                                                                                                                                                                                                                                                                                                                                                                                                                                                                                                                                                                                                                                                                                                                                                                                                                                                                                                                                                                                                                                                                                                                                                                                                                                                                                                                                                                                                                                                                                                                                                                                                                                                                                                                                                                                                                                                                                                             |
|             | <p>ATGGGTATTAGCACCAGCGTTGATAGCGATCACATTGTTCACTGGGTGTAATGTTCCGAGAGCGTTCCGGATAGTGATCGTACC GTTAAATGATAGCGCAAATAACATTG</p> <p>CAACCGCAGCAAAAACCGCAGGTTATGATAAACTGCTGAAAGAACATATTGATGCCCTGGGAAGCAATTTGGGCAAGCAGCAGCATTACC GTTAAAAATGCACGCTGCAGAG</p> <p>CATTATTAAACAGCGCACAGTATGAAC TGCTGAGCAGCACCTATCCGGGTGCACGTGCCAGCATTCGCGCTGGTGGTCTGGCAGGCGTTGGTTATGGTGGTATGATTTTTTGT</p> <p>GATGCAGAAACCTGGATGATGCCGTATCTGCTGCTGACCCATCCGAGCTGGCAAAAAGCATTATTGATTATCGCTTTGATAATCTGCCGGAAGCGCGTGTTAATGTTACCG</p> <p>ATACACGTTTTAATCAGGATCGTGGTATTCTGCTCCGCTGCGTGGTGCATATTTTCCGTGGGTAGCGGTACAGGTGCAATGGGTAGCGAAGCCGGTGATGGTGTCTGTGGTCTG</p> <p>TCGTCACTGCATCTGCAGGCAGATATTGCACTGGCACAGCATCAGTATTATGCAGCAACCGGTGATCGTGCAATTCCTGCAGAAATCAGGCTGGCCGATTCTGAGCGGTATT</p> <p>GCAGATTTCTATACCACAGTGTTACCTGACCGCAGGCGGTTATGACCTGGAACAGGTTACCGCACC GGATGAATATGTGGAAAATGTTAATACCGAAGCCTTTACCAATG</p> <p>GCAGCGCAATTAAAGCACTGGATCTGGCAATTGAAGCAGGCAAAAGCTGAATGAAACCATTCTCCGCTGTGGACCACCGTTCGTGATAATTTTGTAAACCGATTGAACG</p> <p>CGACGGCATCCATCTGGAATATAGCACCTTTAGCCGCTTTAATGAAAAACAACCGTATTAAACAGGCCGATGTTGTGCTGCTGAAATATCCGATGGAATATCCTATGACAGAT</p> <p>ACCCTGGCAGGTAATGATCTGCAGTATTACGCAAGTATTACCAGTCCGGATGGTCCGAGCATGACCGATGCAGTTTATGCAGTTGTTACCGCAGAACTGGGTAGCTGTGATT</p> <p>TTGATCGTTTTCTGGGTGCGAGCTATGATGTTGCCATGGGTCCGTATCATCAGTTTAAACGAAACCCGTGTTCTGGATCGTAGCGAGGTACGACGGTCCGACCAACATTTT</p> <p>TGTTACCGGTGCCGGTGGTTTTCTGCAAGGTGTTGGTATGGGTATGACCGGTTATCGTTTTCTGTGATGATCGTATTGTGGTGAAACCGATTCTGCCGACCGCCATTGAAGGT</p> <p>CAGCCTGCGACAGTGTTTTTTTTCAAAGGTCTGAAATGGCAGGGTCGCGAATTTAATGTTGATATTGGTGCAACCGATACCTGGGTGACCTGACCAAAGGTGATGCCGCAC</p> <p>CGGTTCAGACCGGTGATAATCCGGATGAAC TGTTACCGTTACACAAGAAGCACC GTGAAAAATCCGACACGTAAACCTGTTTCAAGTTAATGCAGATGGCACCAAAAACCAC</p> <p>ACTGCCGTGTCCGGCACCGCAGCCGAGCAGCCTGATGCGTCTGCAGCTCGAGCACCACCACCACCACCACCCTGA</p>                                                                                                                                                                                                                                                                                                                                                                                                                                                                                                                                                                                                                                                                                                                                                                         |
| <i>PzGH</i> |                                                                                                                                                                                                                                                                                                                                                                                                                                                                                                                                                                                                                                                                                                                                                                                                                                                                                                                                                                                                                                                                                                                                                                                                                                                                                                                                                                                                                                                                                                                                                                                                                                                                                                                                                                                                                                                                                                                                                                                                                                                                                                                                                                                                                                                                                                                                                                                                                                                                                                                                                                                                             |

StreGH

ATGAGTCTGACCCGTATTAGCCTGCTGGCAAGCCTGGTTGCAGCAGCACTGGTTGCACCGCTGCCTCCGCTGAGCCATGCAAGCAGTGCGTGCACCGCTGCACCTGGTTGTG  
GTCTAGCGGTGAAGCAGATCCGAGCTGGGCACCAGCAAGCACCACCTTTGGTGAAGCCGAAGGTTATGATCCGTATGTTGGTAATGGTTATCTGGGTGATCGTGTTCGGC  
AGCCGGTGCAGGTTATGCAGCAACCGCACAGAAAACCGTTGGCCTCTGTATACACCGCTTATGATGGTGCATTTGTTGCAGGTCTGTTTGGTCGTGAACAGGATCTGGCA  
GGCGGTCTGTAAGTTATTGCAGCACTGCCGAGCTGGACCACACTGGAAGTTGGTGTGGTCCGGAAACCTATGGTAGCGGTACACCGGCAGGTCTGTGTAGCCGTTATCGTC  
AGACCGTTCATCTGCGTTGTGGTGTGTTGTTTACCAGCCTGCGTTGGACCACCGCAGATGGTCTGCAACCGATCTGACCTATGAAGTTCTGGCAGATCGTAGTGATGTTCA  
TGCGGGTGCAGTTCTGCTGCGTATGACACCGCATTTGGAGCGGCACCGCAACCGTTACCGGTCTGCTGGATAAACGTGGTGCACGTCTGTGTGACCGTTGCAGATGATGGCACC  
TTTCGTACCACCGGTACAGGCACCGAAGGTGCAGTTGTTTACGGCAGGTAGTGGTGAAGGCACCCATACCGTTCTGTGTTACCGATGGTCGCGCATATACCTTTGAAAAATATG  
TTGGTGTGGATACCGCACTGACCAGCCGTGATCCGCTGGCGAGCGCAAGAGCAGCAGCCGTCGTGTCAGAACGTCTGTGGTTGGAGCGGTGTTCTGGCCGATAGCGCAGAAGC  
ATGGCGTACCATTGGGCAAGCGATATTGCAGTTCCGGGTAGCGCAGATCTGACCGCATGGCTGCGTGCAGCACGTTATGGTCTGCTGGCGAATACCCGTACCGGTAGCAGC  
GATAGCCTGGCTCCGGCAGGCCTGACCAGCGATAATTATGCAGGTATGGTTTTTTGGGATGCAGAAACCTGGATGTATCCGGGTCTGTAGCAACCCGTCCGGAACCTGGCAC  
GTAGCGTTGTTGAATATCGTTATCGTACCCGTCATGCAGCCCGTGCAAAATGCAGAACAGCTGGGTTATAAAGGCCGTGTTTTTTCCGTGGACCAGCGCAAGCCGTGGTCGCCCT  
GGATACCGAATGTCAGAGCTGGGATCCGCCTCATTTGTCTGACCCAGAACCATCTGCAGGGTGATGTTAGCCTGGCAGTTTGGCAGTATTATCTGGCAACCCGTGATCGTGAT  
TGGCTGGCAGGTGCGCGTTGGCCACTGCTGAAAGGTATTGCAGATTTTTGGGAAAGCCGTGCAACAGCCGAAGCAGATGGTGGTTATAGCGTTCGTAATGTTGCCGGTCCGG  
ATGAATATAGCAATGGTGTGATGATGGTGTGTTTACCAATGCAGTTGCAGTTCTGGCCCTGCGTAATGCAACCCGTGCCGCACAGCTGCTGGGTGAAAGCGCACCAGCAGG  
TTGGACCCGTGTTGCGGATGGCCTGCGTATTCCGTATGATGCCGAACGTAAACTGTTTCTGCAGTATGCAGGCTATGATGGTAGCACCATTAAACAGGCAGATACCGTTCTG  
CTGACCTATCCGCTGGAATGGCCGATGGAAGAAGGTGCCGCAGCAGCAACCTGGATTTTTATGCCGCACGTACCGATCCGGATGGTCCGGCAATGACCGATAGCGTTCATG  
CAATTGATGCAGCAGCCATTGGTGAACCGGTTGTAGCACCATATACCTATCTGCAGCGTAGCGTGCGTCCGTTTGTTCGTGGTCCGTATCACCTGTTTAGCGAAGCAGCTGG  
TGAAAAAAGCGGTGCACAGGATCCGCTGAGTGGTTTTCCGGCAGAAGATTTTCTGACCGGTAAAGGTGGTTTTCTGCAGGTTTTTACCCATGGCCTGACCGGTCTGCGTCTG  
CGTGAAGATGGTGTGCGTCTGGATCCGAGCCTGCCTCCTCAGCTGCGCGAAGGTGTTGAACTGACAGGCCTGCGTTATCGTGGTTCGTACCTATGATGTGAGCATTTGGTCCGC  
GTACCACCACCGTGCGTCTGACAGATGGCGAACCCTTTACCGTTCATACCCCTGCAGGTCCGCGTCTGTCAGGTACACTGACCCCTGCCGACACGTCTGTCGGATCTGAC  
CCCGACAGTGATGCAGCGGTTGTCTGTCGGCAGCAGCGACAAGTGAAGCACCTGGTCTGTATGCAGCGGCAGCAGTTGATGGTAGTCCGGCAACCGCATGGTCACCGCAG  
GGTGCAGCCGTACGCTGACCGTTGATCTGGGTGCTGCGGTTCTGTGTTGCAAGCGTTACTCCGGCATGGTCAGATGTTGCACCGGCAAGCTATACCGTTGAAACCAAGTCCGG  
ATGGCCGTACCTGGCGTGCATTTCTGTGCCGGTGATGTTGCCCGTAAAGTTCGTATGACCGTTACCTCAGATGATCCGAAAAACCGGTGGGTGTGACCGAACTGGCCGTTGG  
TGCAGAAAAACCGCTCGAGCACCACCACCACCACCTGA

**Table S4.** Overview of all compounds tested as possible acceptor for the selected GH65 glycoside phosphorylases.

| <b>Monosaccharides</b> | <b>Disaccharides</b> | <b>Sugar alcohols</b> | <b>Other</b>                  |
|------------------------|----------------------|-----------------------|-------------------------------|
| Arabinose              | Cellobiose           | Arabitol              | $\alpha$ -methylglucoside     |
| Fructose               | Gentiobiose          | Erythritol            | $\beta$ -methylglucoside      |
| Galactose              | Isomaltose           | Galactitol            | Galactosamine                 |
| Glucose                | Isomaltulose         | Glycerol              | Glucose 6-phosphate           |
| Lyxose                 | Kojibiose            | Mannitol              | <i>N</i> -acetylgalactosamine |
| Mannose                | Lactose              | Ribitol               | <i>N</i> -acetylglucosamine   |
| Psicose                | Lactulose            | Sorbitol              | <i>N</i> -acetylmannosamine   |
| Ribose                 | Maltose              | Xylitol               | Water                         |
| Tagatose               | Maltulose            |                       |                               |
| Xylose                 | Melibiose            |                       |                               |
| L-arabinose            | Nigerose             |                       |                               |
| L-fucose               | Sucrose              |                       |                               |
| L-rhamnose             | Trehalose            |                       |                               |
| L-ribose               | Turanose             |                       |                               |
| L-sorbose              |                      |                       |                               |
| L-xylose               |                      |                       |                               |
